# Supplementary material for: Analysis of Barriers to Wide Spread Adoption of Electric Vehicles in Shenzhen China
Source: Preprints.org preprint supplement (doi:10.20944/preprints201702.0089.v2), 2017-02-26
Supplement: Supplementary file 1 [file Table10.xls]

## Sheet: Sheet1
Total Variance Explained
Component	Initial Eigenvalues			Extraction Sums of Squared Loadings			Rotation Sums of Squared Loadings
	Total	% of Variance	Cumulative %	Total	% of Variance	Cumulative %	Total	% of Variance	Cumulative %
1	3.83354	21.2974	21.2974	3.83354	21.2974	21.2974	2.60326	14.4626	14.4626
2	1.86259	10.3477	31.6452	1.86259	10.3477	31.6452	2.05385	11.4103	25.8728
3	1.49809	8.32272	39.9679	1.49809	8.32272	39.9679	1.81274	10.0708	35.9436
4	1.08873	6.04847	46.0164	1.08873	6.04847	46.0164	1.5435	8.57498	44.5186
5	1.03475	5.74862	51.765	1.03475	5.74862	51.765	1.30435	7.24637	51.765
6	0.999047	5.55026	57.3152
7	0.948489	5.26938	62.5846
8	0.850951	4.7275	67.3121
9	0.810387	4.50215	71.8143
10	0.742044	4.12247	75.9367
11	0.691025	3.83903	79.7758
12	0.660315	3.66842	83.4442
13	0.647231	3.59573	87.0399
14	0.58825	3.26806	90.308
15	0.549412	3.05229	93.3603
16	0.529697	2.94276	96.303
17	0.448602	2.49224	98.7953
18	0.216854	1.20474	100
Extraction Method: Principal Component Analysis.
