# Supplementary material for: Analysis of Barriers to Wide Spread Adoption of Electric Vehicles in Shenzhen China
Source: Preprints.org preprint supplement (doi:10.20944/preprints201702.0089.v2), 2017-02-26
Supplement: Supplementary file 2 [file Table11.xls]

## Sheet: Sheet1
Rotated Component Matrixa
	Component
	1	2	3	4	5
Q24	0.627677
Q25			0.934907
Q26			0.925724
Q27					0.788243
Q28
Q29
Q30
Q31	0.554243
Q32	0.526284
Q33		0.531878
Q34		0.677999
Q35		0.635539
Q36
Q37	0.602924
Q38				0.815194
Q39				0.804074
Q40
Q41	0.680448
Extraction Method: Principal Component Analysis. Rotation Method: Varimax with Kaiser Normalization.
a. Rotation converged in 5 iterations.
