# Supplementary material for: Analysis of Barriers to Wide Spread Adoption of Electric Vehicles in Shenzhen China
Source: Preprints.org preprint supplement (doi:10.20944/preprints201702.0089.v2), 2017-02-26
Supplement: Supplementary file 3 [file Table12.xls]

## Sheet: Sheet1
Coefficientsa
Model		Unstandardized Coefficients		Standardized Coefficients	t	Sig.	Collinearity Statistics
		B	Std. Error	Beta			Tolerance	VIF
	(Constant)	2.44608	0.0228756		106.93	1.96493e-298
	factor score 1	0.389611	0.0229037	0.627677	17.0108	2.51803e-49	1	1
	factor score 2	0.127295	0.0229037	0.205076	5.55782	4.96907e-08	1	1
	factor score 4	0.0732196	0.0229037	0.117959	3.19685	0.00149868	1	1
a. Dependent Variable: Q24
