# Supplementary material for: Analysis of Barriers to Wide Spread Adoption of Electric Vehicles in Shenzhen China
Source: Preprints.org preprint supplement (doi:10.20944/preprints201702.0089.v2), 2017-02-26
Supplement: Supplementary file 4 [file Table13.xls]

## Sheet: Sheet1
Model		Unstandardized Coefficients		Standardized Coefficients	t	Sig.	Collinearity Statistics
		B	Std. Error	Beta			Tolerance	VIF
	(Constant)	1.94363	0.0361723		53.7324	7.52629e-186
	factor 1	0.25859	0.0362167	0.245461	7.14008	4.38197e-12	1	1
	factor 2	0.669533	0.0362167	0.635539	18.4868	1.05742e-55	1	1
	factor 3	0.181666	0.0362167	0.172442	5.01607	7.92247e-07	1	1
	factor 5	-0.181921	0.0362167	-0.172685	-5.02312	7.65347e-07	1	1
a. Dependent Variable: Purchasing willingness
