# Supplementary material for: Analysis of Barriers to Wide Spread Adoption of Electric Vehicles in Shenzhen China
Source: Preprints.org preprint supplement (doi:10.20944/preprints201702.0089.v2), 2017-02-26
Supplement: Supplementary file 5 [file Table14-15.xlsx]

## Sheet: Sheet1
					Vehicle Type	Pure Electricity Vehicle Range R(Condition)
						80≤R150Km		150Km≤R<250Km		R≥250Km		R≥50Km
					PEVs(2013)	35,000RMB /Per ones		50,000RMB/Per ones		60,000/Per ones
					PEVs(2014-2015)	35,000RMB /Per ones		50,000RMB/Per ones		60,000/Per ones
					PHEVs(2013)							35,000/Per ones
					PHEVs(2014-2015)							35,000/Per ones
