# Supplementary material for: Analysis of Barriers to Wide Spread Adoption of Electric Vehicles in Shenzhen China
Source: Preprints.org preprint supplement (doi:10.20944/preprints201702.0089.v2), 2017-02-26
Supplement: Supplementary file 6 [file Table16.xls]

## Sheet: Sheet1
KMO and Bartlett's Test
Kaiser-Meyer-Olkin Measure of Sampling Adequacy.		0.817516
Bartlett's Test of Sphericity	Approx. Chi-Square	839.176
	df	66
	Sig.	2.08825e-134
