# Supplementary material for: Analysis of Barriers to Wide Spread Adoption of Electric Vehicles in Shenzhen China
Source: Preprints.org preprint supplement (doi:10.20944/preprints201702.0089.v2), 2017-02-26
Supplement: Supplementary file 7 [file Table17.xls]

## Sheet: Sheet1
Total Variance Explained
Component	Initial Eigenvalues			Extraction Sums of Squared Loadings			Rotation Sums of Squared Loadings
	Total	% of Variance	Cumulative %	Total	% of Variance	Cumulative %	Total	% of Variance	Cumulative %
1	3.3207	27.6725	27.6725	3.3207	27.6725	27.6725	2.76707	23.059	23.059
2	1.4024	11.6866	39.3591	1.4024	11.6866	39.3591	1.91535	15.9612	39.0202
3	1.09403	9.11689	48.476	1.09403	9.11689	48.476	1.1347	9.45581	48.476
4	0.958586	7.98822	56.4642
5	0.920643	7.67203	64.1362
6	0.775034	6.45861	70.5949
7	0.757828	6.31523	76.9101
8	0.672768	5.6064	82.5165
9	0.646156	5.38463	87.9011
10	0.596831	4.97359	92.8747
11	0.468029	3.90024	96.775
12	0.387005	3.22505	100
Extraction Method: Principal Component Analysis.
