# Supplementary material for: Analysis of Barriers to Wide Spread Adoption of Electric Vehicles in Shenzhen China
Source: Preprints.org preprint supplement (doi:10.20944/preprints201702.0089.v2), 2017-02-26
Supplement: Supplementary file 8 [file Table18.xls]

## Sheet: Sheet1
Rotated Component Matrixa
	Component
	1	2	3
Q42			0.566471
Q43		0.642667
Q44			0.663163
Q45	0.726199
Q46			0.549993
Q47	0.741767
Q48	0.732523
Q49	0.660077
Q50	0.676635
Q51		0.545278
Q52		0.619698
Q53		0.757172
Extraction Method: Principal Component Analysis. Rotation Method: Varimax with Kaiser Normalization.
a. Rotation converged in 5 iterations.
