# Supplementary material for: Analysis of Barriers to Wide Spread Adoption of Electric Vehicles in Shenzhen China
Source: Preprints.org preprint supplement (doi:10.20944/preprints201702.0089.v2), 2017-02-26
Supplement: Supplementary file 9 [file Table19.xls]

## Sheet: Sheet1
Coefficientsa
Model		Unstandardized Coefficients		Standardized Coefficients	t	Sig.	Collinearity Statistics
		B	Std. Error	Beta			Tolerance	VIF
	(Constant)	1.42892	0.0293814		48.6335	3.40855e-171
	factor score 1	0.224581	0.0294175	0.296224	7.63428	1.64772e-13	1	1
	factor score 3	0.416976	0.0294175	0.549993	14.1744	2.55176e-37	1	1
a. Dependent Variable: Q46
