# Supplementary material for: Analysis of Barriers to Wide Spread Adoption of Electric Vehicles in Shenzhen China
Source: Preprints.org preprint supplement (doi:10.20944/preprints201702.0089.v2), 2017-02-26
Supplement: Supplementary file 10 [file Table1Sample discription.xlsx]

## Sheet: Sheet1
Gender	Male	0.764
	Female	0.236
Age	18-22 Years old	0.012
	22-35 Years old	0.534
	Over 35 Years old	0.453
Occupation	Office worker	0.404
	Senior Manager	0.212
	Private Firm Owner	0.244
	University Student	0.047
	Research &Design Engineer	0.094
Drive Experience	Less than 3 years	0.315
	Between 3-5 years	0.15
	Between 5-8years	0.197
	Over 8 years	0.337
Annual Income	Less than $8000	0.18
	$8000-$15000	0.335
	$15000-$50000	0.357
	Over $50000	0.128
Home Ownership	Owned Apartment	0.542
	Rent for Living	0.308
	Dormitory	0.113
	Others	0.037
Travel Pattern	Owned Private Car	0.557
	Company Scheduled Bus	0.062
	Public Bus or Metro	0.266
	Others	0.116
