# Supplementary material for: Analysis of Barriers to Wide Spread Adoption of Electric Vehicles in Shenzhen China
Source: Preprints.org preprint supplement (doi:10.20944/preprints201702.0089.v2), 2017-02-26
Supplement: Supplementary file 11 [file Table4.xls]

## Sheet: Sheet1
KMO and Bartlett's Test
Kaiser-Meyer-Olkin Measure of Sampling Adequacy.		0.683973
Bartlett's Test of Sphericity	Approx. Chi-Square	578.781
	df	105
	Sig.	1.3268e-66
