# Supplementary material for: Analysis of Barriers to Wide Spread Adoption of Electric Vehicles in Shenzhen China
Source: Preprints.org preprint supplement (doi:10.20944/preprints201702.0089.v2), 2017-02-26
Supplement: Supplementary file 12 [file Table5.xls]

## Sheet: Sheet1
Total Variance Explained
Component	Initial Eigenvalues			Extraction Sums of Squared Loadings			Rotation Sums of Squared Loadings
	Total	% of Variance	Cumulative %	Total	% of Variance	Cumulative %	Total	% of Variance	Cumulative %
1	2.58924	17.2616	17.2616	2.58924	17.2616	17.2616	1.91215	12.7477	12.7477
2	1.57998	10.5332	27.7948	1.57998	10.5332	27.7948	1.67738	11.1825	23.9302
3	1.2917	8.61133	36.4062	1.2917	8.61133	36.4062	1.43895	9.59303	33.5232
4	1.11938	7.46251	43.8687	1.11938	7.46251	43.8687	1.3842	9.22801	42.7512
5	1.02047	6.80315	50.6718	1.02047	6.80315	50.6718	1.18809	7.92058	50.6718
6	0.967076	6.44717	57.119
7	0.881062	5.87375	62.9927
8	0.862004	5.74669	68.7394
9	0.85118	5.67454	74.414
10	0.823458	5.48972	79.9037
11	0.745014	4.96676	84.8705
12	0.656881	4.37921	89.2497
13	0.601271	4.00847	93.2581
14	0.537192	3.58128	96.8394
15	0.474088	3.16059	100
Extraction Method: Principal Component Analysis.
