# Supplementary material for: Analysis of Barriers to Wide Spread Adoption of Electric Vehicles in Shenzhen China
Source: Preprints.org preprint supplement (doi:10.20944/preprints201702.0089.v2), 2017-02-26
Supplement: Supplementary file 13 [file Table6.xls]

## Sheet: Sheet1
Rotated Component Matrixa
	Component
	1	2	3	4	5
Q9	0.534077	0.00562096	0.121822	0.0369267	0.379162
Q10	-0.126534	0.398298	0.0470796	0.466817	0.100481
Q11	0.169299	0.179323	0.555452	-0.154894	0.287166
Q12	0.0532312	-0.082469	-0.612269	0.227659	0.415543
Q13	0.0220265	0.0199558	0.0825283	0.0172378	-0.790001
Q14	0.00259561	-0.0581622	0.720037	0.2103	-0.0909121
Q15	-0.154395	-0.191695	-0.119461	0.609687	0.0734857
Q16	0.702669	0.119491	0.0304899	-0.0271702	-0.0206134
Q17	0.751032	0.105523	0.0627802	0.0408095	-0.0324684
Q18	0.294185	0.579333	0.103243	0.0815261	0.23218
Q19	0.535575	0.240053	-0.104256	-0.0156574	-0.0380882
Q20	0.139125	0.151154	0.201266	0.594494	-0.0107758
Q21	0.137103	0.660846	-0.07755	-0.141752	-0.166502
Q22	0.16197	0.748002	0.118219	0.0898005	-0.0247472
Q23	0.243942	-0.0385564	-0.334761	0.531019	-0.23671
Extraction Method: Principal Component Analysis. Rotation Method: Varimax with Kaiser Normalization.
a. Rotation converged in 7 iterations.
