# Supplementary material for: Analysis of Barriers to Wide Spread Adoption of Electric Vehicles in Shenzhen China
Source: Preprints.org preprint supplement (doi:10.20944/preprints201702.0089.v2), 2017-02-26
Supplement: Supplementary file 14 [file Table7.xls]

## Sheet: Sheet1
Model	Unstandardized Coefficients		Standardized Coefficients	t	Sig.	Collinearity Statistics
	B	Std. Error	Beta			Tolerance	VIF
(Constant)	2.36386	0.0304873		77.5359	1.07125e-242
factor 1	0.212397	0.0305251	0.243942	6.95811	1.42172e-11	1	1
factor 3	-0.291472	0.0305251	-0.334761	-9.54859	1.35127e-19	1	1
factor 4	0.462351	0.0305251	0.531019	15.1466	2.89381e-41	1	1
factor 5	-0.2061	0.0305251	-0.23671	-6.75183	5.16891e-11	1	1
