# Supplementary material for: Analysis of Barriers to Wide Spread Adoption of Electric Vehicles in Shenzhen China
Source: Preprints.org preprint supplement (doi:10.20944/preprints201702.0089.v2), 2017-02-26
Supplement: Supplementary file 16 [file Tables of Fishers' tests.xlsx]

## Sheet: Sheet1
Table 2: Factors Vs Brand preference
Factors	Pearson Chi-Square Sig.	Fisher's Exact Test Sig.
Occupation	0.004	0.004
Gender	0.013	0.007
Table 3 :Factors Vs. EV Experience
Factors	Pearson Chi-Square Sig.	Fisher's Exact Test Sig.
Gender	0.039	0.029
Driver Age	0.008	0.006
Age	0.582	0.643
Incoming	0.321	0.317
Occupation	0.132	0.135
Home Ownership	0.224	0.214
Origion	0.07	0.07
Table 8: Factors Vs. Willingness to buy EV
Factors	Pearson Chi-Square Sig.	Fisher's Exact Test Sig.
Occupation	0.043	0.025
Incoming	0.014	0.025
Society network members	0	0.001
ICVs technology improve	0	0
Attitude toward Evs	0.001	0.001
